# Supplementary material for: Porous poly(2-octyl cyanoacrylate): a facile one-step preparation of superhydrophobic coatings on different substrates
Source: Royal Society of Chemistry journal article supplement (doi:10.1039/c2ta00934j), 2012-11-29
Supplement: c2ta00934j.pdf [file c2ta00934j.pdf]

# Supporting Information

## Porous Poly(2-Octyl Cyanoacrylate): a Facile One-Step Preparation of Superhydrophobic Coatings on Different Substrates

Xin Du,<sup>a</sup> Junsheng Li,<sup>a,b</sup> Linxian Li,<sup>a,c</sup> and Pavel A. Levkin<sup>\*a,b</sup>

<sup>a</sup> Institute of Toxicology and Genetics, Karlsruhe Institute of Technology, 76021 Karlsruhe, Germany. \*E-mail: levkin@kit.edu.

<sup>b</sup> Department of Applied Physical Chemistry, University of Heidelberg, 69120 Heidelberg, Germany.

<sup>c</sup> Department of Organic Chemistry, University of Heidelberg, 69120 Heidelberg, Germany

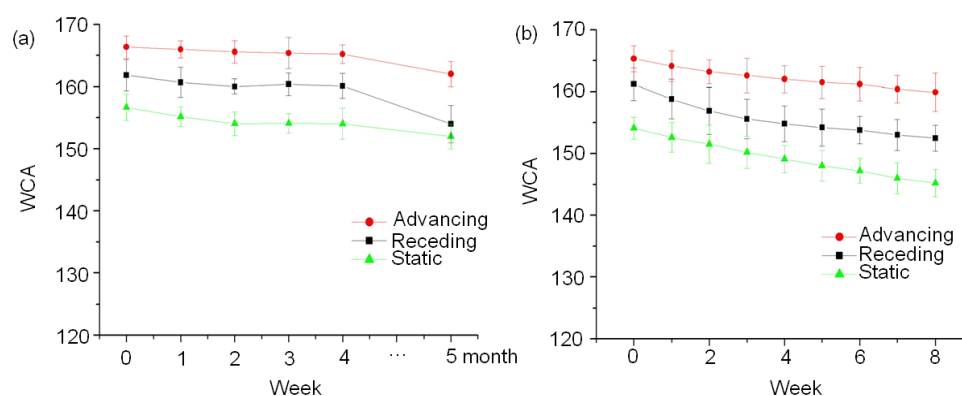

**Figure S1.** Stability of the superhydrophobic coatings. (a) Water contact angles (static, advancing and receding) of a poly(2-octyl cyanoacrylate) superhydrophobic film over 4 weeks (indoor) and after 5 months. (b) WCA of a poly(2-octyl cyanoacrylate) superhydrophobic film over 8 weeks (outdoor)

### Description of the conditions for the long term indoor and outdoor stability tests.

Indoor stability test was performed by keeping a superhydrophobic sample in a Petri-dish in the lab environment at room temperature for several months.

Outdoor stability test was performed by exposing a sample to the urban environment such as sunlight, dust or occasional rain.

All samples were analyzed once a week by measuring the WCAs.
